# Supplementary material for: Allelopathy and Identification of Five Allelochemicals in the Leaves of the Aromatic Medicinal Tree Aegle marmelos (L.) Correa
Source: MDPI journal article supplement (doi:10.3390/plants13040559), 2024-02-19
Supplement: s1 [file s1]

### Spectral Data of five compounds

Compound-1 (umbelliferone);  $^1\text{H}$  NMR (500 MHz, acetone- $d_6$ )  $\delta_{\text{H}}$  7.86 (1H, d,  $J = 9.5$ ), 7.51 (1H, d,  $J = 8.5$ ), 6.84 (1H, dd,  $J = 8.5, 2.3$ ), 6.75 (1H, d,  $J = 2.3$ ), 6.16 (1H, d,  $J = 9.5$ ); HRESIMS  $m/z$  161.0242  $[\text{M}-\text{H}]^-$  (calcd for  $\text{C}_9\text{H}_6\text{O}_3$  161.0244).

Compound-2 (*trans*-ferulic acid);  $^1\text{H}$  NMR (500 MHz,  $\text{CD}_3\text{OD} + \text{CDCl}_3$ )  $\delta_{\text{H}}$  7.53 (1H, d,  $J = 15.8$ ), 7.05 (1H, d,  $J = 1.9$ ), 7.00 (1H, dd,  $J = 8.3, 1.9$ ), 6.87 (1H, d,  $J = 8.3$ ), 6.24 (1H, d,  $J = 15.8$ ),  $\delta_{\text{H}}$  3.88 (3H, s); HRESIMS  $m/z$  193.0506  $[\text{M}-\text{H}]^-$  (calcd for  $\text{C}_{10}\text{H}_9\text{O}_4$  193.0506).

Compound-3 ((*E*)-4-hydroxycinnamic acid methyl ester);  $^1\text{H}$  NMR (500 MHz,  $\text{CD}_3\text{OD}$ )  $\delta_{\text{H}}$  7.62 (1H, d,  $J = 16.0$ ), 7.46 (2H, d,  $J = 8.6$ ), 6.81 (2H, d,  $J = 8.6$ ), 6.33 (1H, d,  $J = 16.0$ ), 3.76 (3H, s); HRESIMS  $m/z$  177.0555  $[\text{M}-\text{H}]^-$  (calcd for  $\text{C}_{10}\text{H}_{10}\text{O}_3$  177.0557).

Compound-4 (*trans*-cinnamic acid);  $^1\text{H}$  NMR (500 MHz,  $\text{CDCl}_3$ )  $\delta_{\text{H}}$  7.78 (1H, d,  $J = 16.0$ ), 7.56 (2H, m), 7.43–7.39 (3H, m), 6.46 (1H, d,  $J = 16.0$ ); HRESIMS  $m/z$  147.0449  $[\text{M}-\text{H}]^-$  (calcd for  $\text{C}_9\text{H}_8\text{O}_2$  147.0452).

Compound-5 (methyl (*E*)-3'-hydroxyl-4'-methoxycinnamate);  $^1\text{H}$  NMR (500 MHz,  $\text{CDCl}_3$ )  $\delta_{\text{H}}$  7.60 (1H, d,  $J = 15.9$ ), 7.13 (1H, d,  $J = 2.1$ ), 7.03 (1H, dd,  $J = 8.3, 2.1$ ), 6.84 (1H, d,  $J = 8.3$ ), 6.29 (1H, d,  $J = 15.9$ ), 3.93 (3H, s), 3.79 (3H, s); HRESIMS  $m/z$  207.0660  $[\text{M}-\text{H}]^-$  (calcd for  $\text{C}_{11}\text{H}_{11}\text{O}_4$  207.0663).
